# Supplementary material for: May 1,2-Dithiolane-4-carboxylic Acid and Its Derivatives Serve as a Specific Thioredoxin Reductase 1 Inhibitor?
Source: MDPI journal article supplement (doi:10.3390/molecules28186647), 2023-09-15
Supplement: s1 [file s1]

# **May 1,2-dithiolane-4-carboxylic acid and its derivatives serve as a specific thioredoxin reductase 1 inhibitor?**

Nikitjuka Anna<sup>1,\*</sup>, Krims-Davis Kristaps<sup>1</sup>, Kaņepe Iveta<sup>1</sup>, Ozola Melita<sup>1</sup>, Žalubovskis Raivis<sup>1,2,\*</sup>

<sup>1</sup>*Latvian Institute of Organic Synthesis, Aizkraukles 21, LV-1006, Riga, Latvia*

<sup>2</sup>*Institute of Technology of Organic Chemistry, Faculty of Materials Science and Applied Chemistry, Riga Technical University, P. Valdena iela 3, LV-1048 Riga, Latvia*

\*Corresponding authors: Anna Nikitjuka, Raivis Žalubovskis

anna@osi.lv; raivis@osi.lv

## Table of Contents

|                                                                                                                                                    |    |
|----------------------------------------------------------------------------------------------------------------------------------------------------|----|
| <i>N</i> -Phenyl-1,2-dithiolane-4-carboxamide (2a) (CDCl <sub>3</sub> ) .....                                                                      | 3  |
| <i>N</i> -(4-Methoxyphenyl)-1,2-dithiolane-4-carboxamide (2b) (CDCl <sub>3</sub> ).....                                                            | 5  |
| <i>N</i> -(4-(Trifluoromethyl)phenyl)-1,2-dithiolane-4-carboxamide (2c) (CDCl <sub>3</sub> ).....                                                  | 7  |
| <i>N</i> -(2,4-dimethoxyphenyl)-1,2-dithiolane-4-carboxamide (2d) (CDCl <sub>3</sub> ) .....                                                       | 9  |
| <i>N</i> -(3,5-Dimethoxyphenyl)-1,2-dithiolane-4-carboxamide (2e) (Acetone-d <sub>6</sub> ) .....                                                  | 11 |
| <i>t</i> Butyl 2-(1,2-dithiolane-4-carboxamido)-3-methylpentanoate (2f) (CDCl <sub>3</sub> ).....                                                  | 13 |
| 2-(1,2-Dithiolane-4-carboxamido)-3-methylpentanoic acid (2g) (MeOH-d <sub>4</sub> ) .....                                                          | 15 |
| <i>N,N</i> -Dimethyl-1,2-dithiolane-4-carboxamide (2h) .....                                                                                       | 17 |
| <i>N</i> -(Methylsulfonyl)-1,2-dithiolane-4-carboxamide (2i) (MeOH-d <sub>4</sub> ).....                                                           | 19 |
| <i>N</i> -(2-Oxo-2H-chromen-6-yl)-1,2-dithiolane-4-carboxamide (2j).....                                                                           | 21 |
| <i>N</i> -(2-oxo-2H-chromen-3-yl)-1,2-dithiolane-4-carboxamide (2k) (CD <sub>3</sub> CN/Acetone, low solubility) ....                              | 22 |
| <i>N</i> -(4-methyl-2-oxo-2H-chromen-7-yl)-1,2-dithiolane-4-carboxamide (2l, 1,2-dithiolane signal is overlapped with residue water signal ) ..... | 24 |
| Determination of the Reaction Rate and IC <sub>50</sub> of colorimetric TrxR1 enzymatic assays.....                                                | 26 |

***N*-Phenyl-1,2-dithiolane-4-carboxamide (2a) (CDCl<sub>3</sub>)**

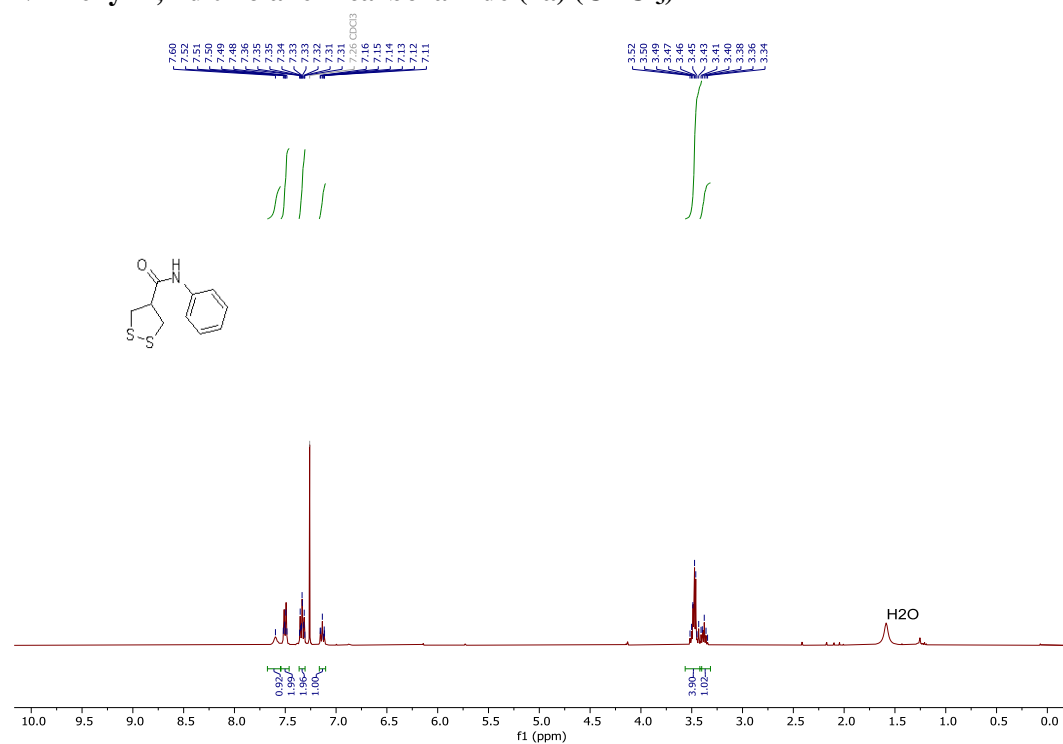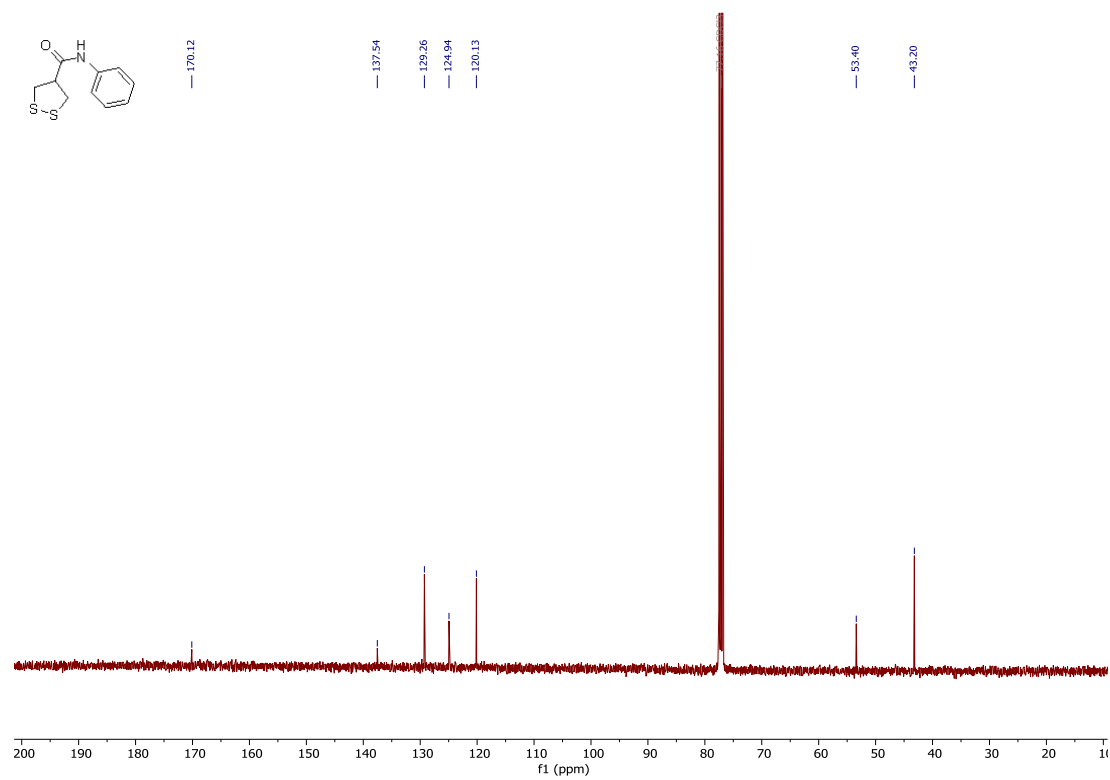

## Elemental Composition Report

Tolerance = 5.0 PPM / DBE: min = -1.5, max = 200.0

Element prediction: Off

Number of isotope peaks used for i-FIT = 5

Monoisotopic Mass, Even Electron Ions

138 formula(e) evaluated with 1 results within limits (all results (up to 1000) for each mass)

Elements Used:

C: 0-50 H: 0-100 N: 0-3 O: 0-3 S: 0-2

2883 Nikitjuka **2a**

HRMS\_2022\_04\_528 689 (1.970) Cm (689:699-(663.675+723:729))

OSI/FOKL-MS  
Synapt G2-Si  
1: TOF MS ES+  
4.95e+005

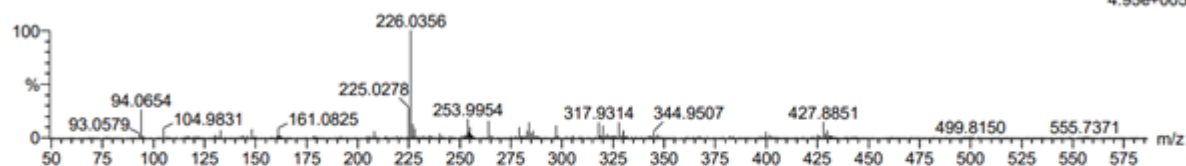

Minimum: 80.00  
Maximum: 100.00

| Mass     | RA     | Calc. Mass | mDa  | PPM  | DBE | i-FIT | Norm | Conf (%) | Formula        |
|----------|--------|------------|------|------|-----|-------|------|----------|----------------|
| 226.0356 | 100.00 | 226.0360   | -0.4 | -1.8 | 5.5 | 295.0 | n/a  | n/a      | C10 H12 N O S2 |

***N*-(4-Methoxyphenyl)-1,2-dithiolane-4-carboxamide (2b) (CDCl<sub>3</sub>)**

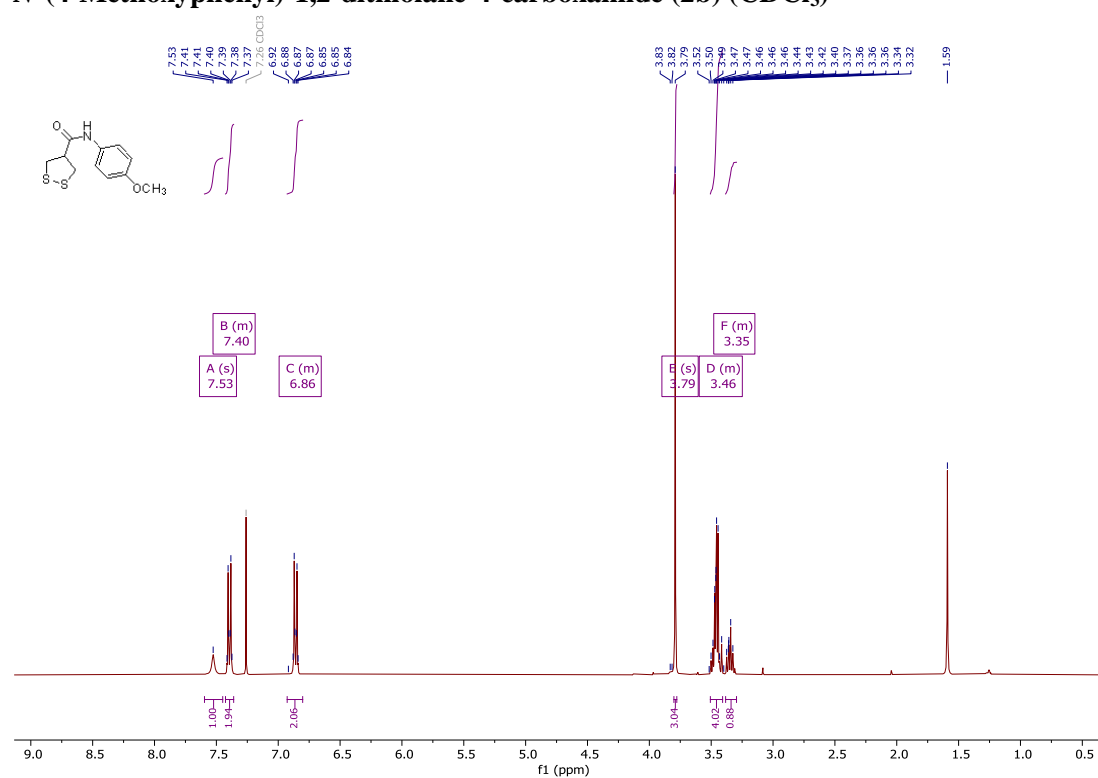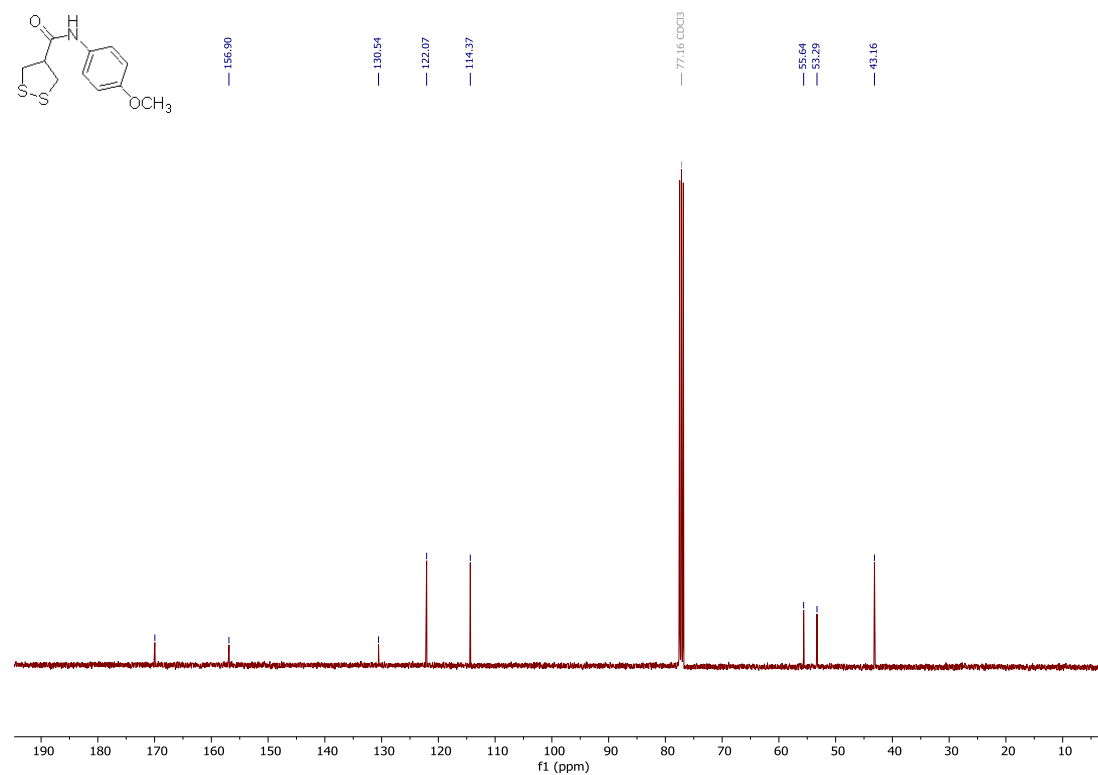

Tolerance = 5.0 PPM / DBE: min = -1.5, max = 200.0

Element prediction: Off

Number of isotope peaks used for i-FIT = 5

Monoisotopic Mass, Even Electron Ions

156 formula(e) evaluated with 1 results within limits (all results (up to 1000) for each mass)

Elements Used:

C: 0-50 H: 0-100 N: 0-3 O: 0-3 S: 0-2

2882 Nikitjuka **2b**

HRMS\_2022\_04\_526 674 (1.929) Cm (673:683-(645:651+699:708))

OSI/FOKL-MS

Synapt G2-Si

1: TOF MS ES+

3.26e+006

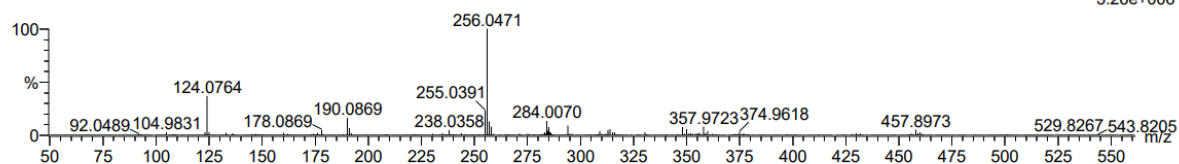

Minimum: 80.00

-1.5

Maximum: 100.00

5.0

5.0

200.0

| Mass     | RA     | Calc. Mass | mDa | PPM | DBE | i-FIT | Norm | Conf (%) | Formula         |
|----------|--------|------------|-----|-----|-----|-------|------|----------|-----------------|
| 256.0471 | 100.00 | 256.0466   | 0.5 | 2.0 | 5.5 | 633.4 | n/a  | n/a      | C11 H14 N O2 S2 |

***N*-(4-(Trifluoromethyl)phenyl)-1,2-dithiolane-4-carboxamide (2c) (CDCl<sub>3</sub>)**

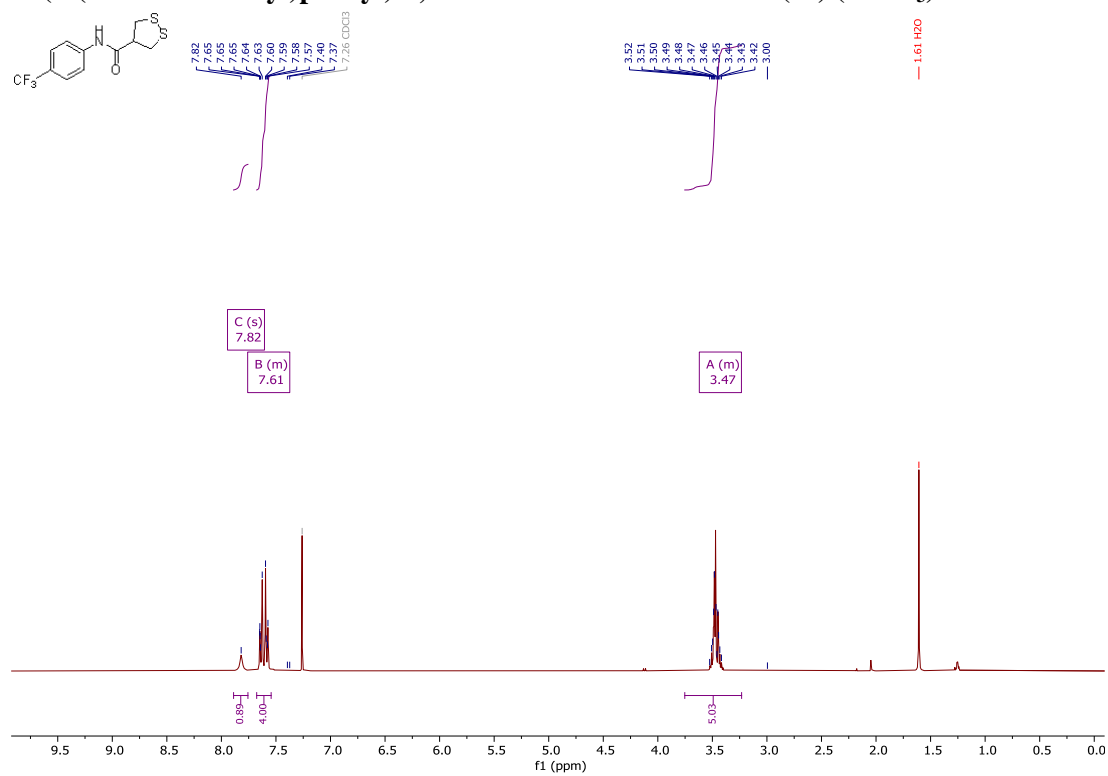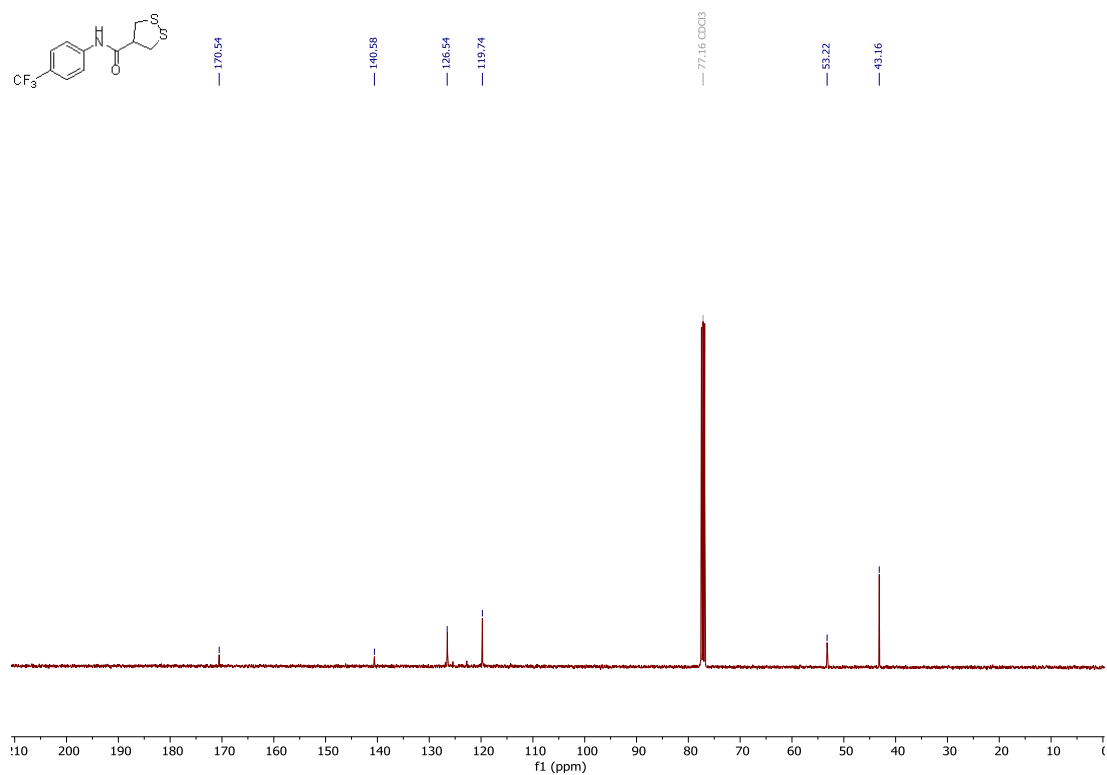

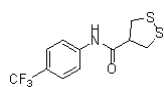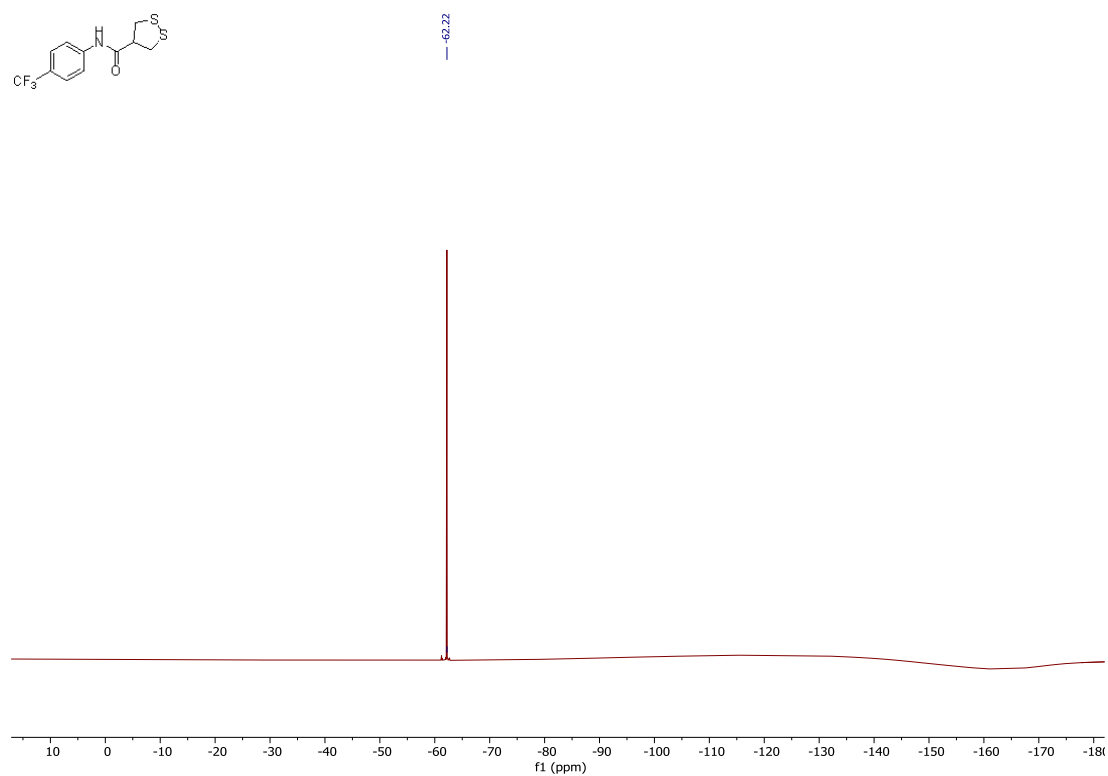

Tolerance = 5.0 PPM / DBE: min = -1.5, max = 200.0

Element prediction: Off

Number of isotope peaks used for i-FIT = 5

**2c**

Monoisotopic Mass, Even Electron Ions

370 formula(e) evaluated with 1 results within limits (all results (up to 1000) for each mass)

Elements Used:

C: 0-50 H: 0-100 N: 0-2 O: 0-2 F: 0-3 S: 0-2

2886 Nikitjuka

HRMS\_2022\_04\_534 769 (2.200) Cm (768:775-740:750)

OSI/FOKL-MS  
Synapt G2-Si  
1: TOF MS ES+  
6.07e+005

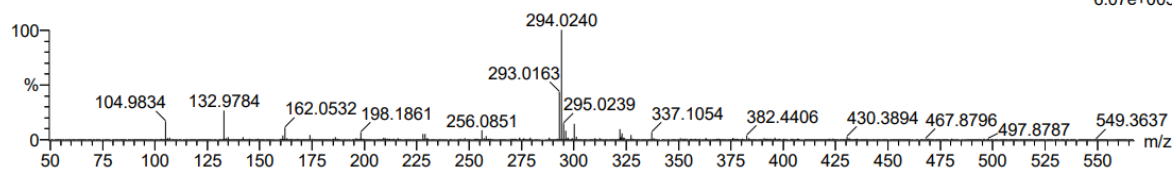

Minimum: 80.00  
Maximum: 100.00

| Mass     | RA     | Calc. Mass | mDa | PPM | DBE | i-FIT | Norm | Conf(%) | Formula           |
|----------|--------|------------|-----|-----|-----|-------|------|---------|-------------------|
| 294.0240 | 100.00 | 294.0234   | 0.6 | 2.0 | 5.5 | 513.4 | n/a  | n/a     | C11 H11 N O F3 S2 |



***N*-(2,4-dimethoxyphenyl)-1,2-dithiolane-4-carboxamide (2d) (CDCl<sub>3</sub>)**

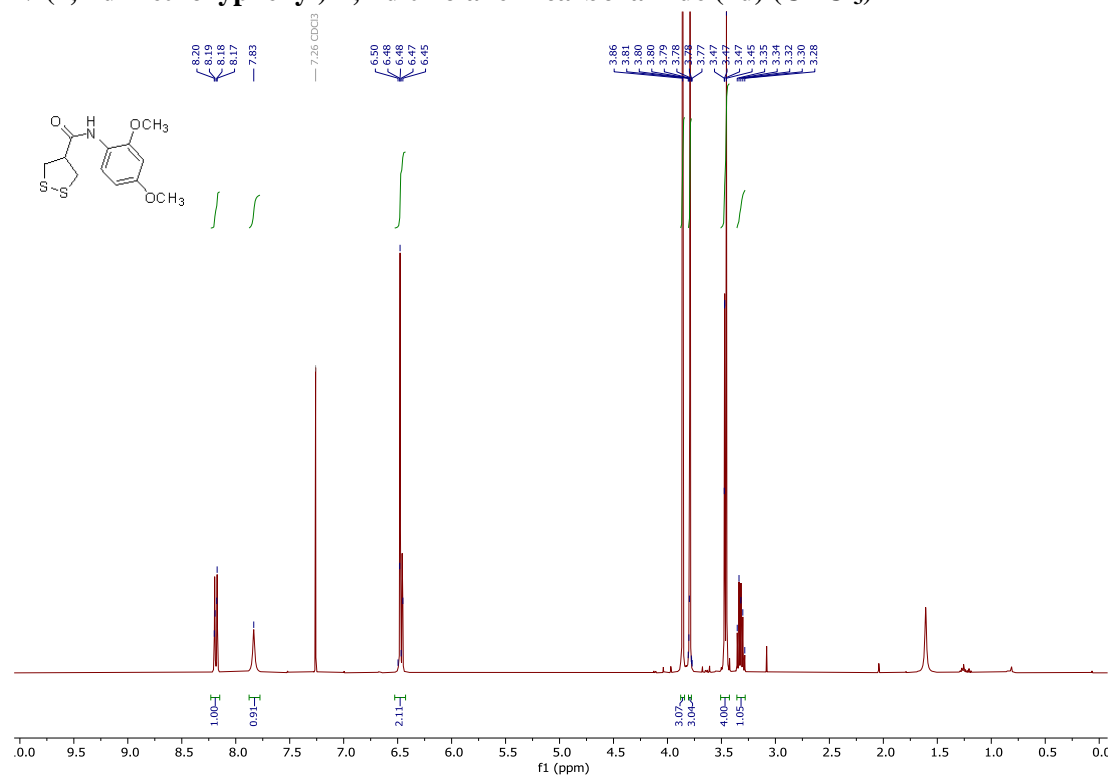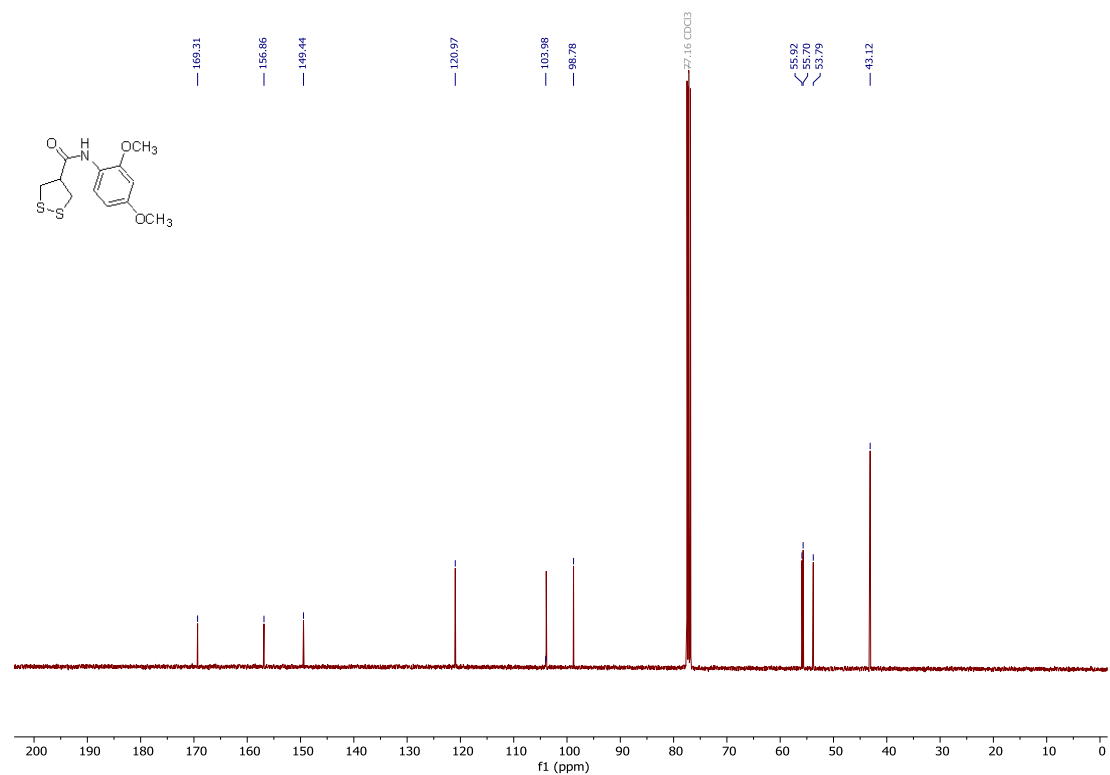

Tolerance = 5.0 PPM / DBE: min = -1.5, max = 200.0  
 Element prediction: Off  
 Number of isotope peaks used for i-FIT = 5

Monoisotopic Mass, Even Electron Ions

172 formula(e) evaluated with 1 results within limits (all results (up to 1000) for each mass)

Elements Used:

C: 0-50 H: 0-100 N: 0-3 O: 0-3 S: 0-2

2887 Nikitjuka **2d**

HRMS\_2022\_04\_536 706 (2.017) Cm (706:713-668:678)

OSI/FOKL-MS  
 Synapt G2-Si  
 1: TOF MS ES+  
 7.58e+006

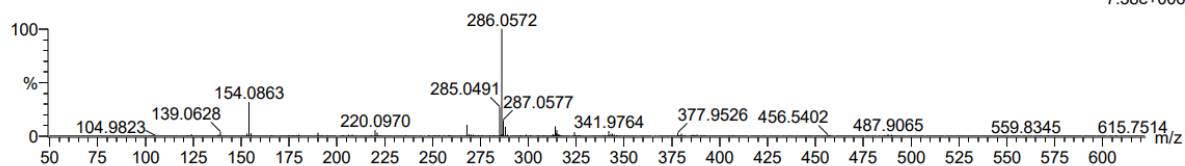

Minimum: 80.00 -1.5  
 Maximum: 100.00 2.0 5.0 200.0

| Mass     | RA     | Calc. Mass | mDa | PPM | DBE | i-FIT | Norm | Conf (%) | Formula         |
|----------|--------|------------|-----|-----|-----|-------|------|----------|-----------------|
| 286.0572 | 100.00 | 286.0572   | 0.0 | 0.0 | 5.5 | 894.8 | n/a  | n/a      | C12 H16 N O3 S2 |

***N*-(3,5-Dimethoxyphenyl)-1,2-dithiolane-4-carboxamide (2e) (Acetone-d<sub>6</sub>)**

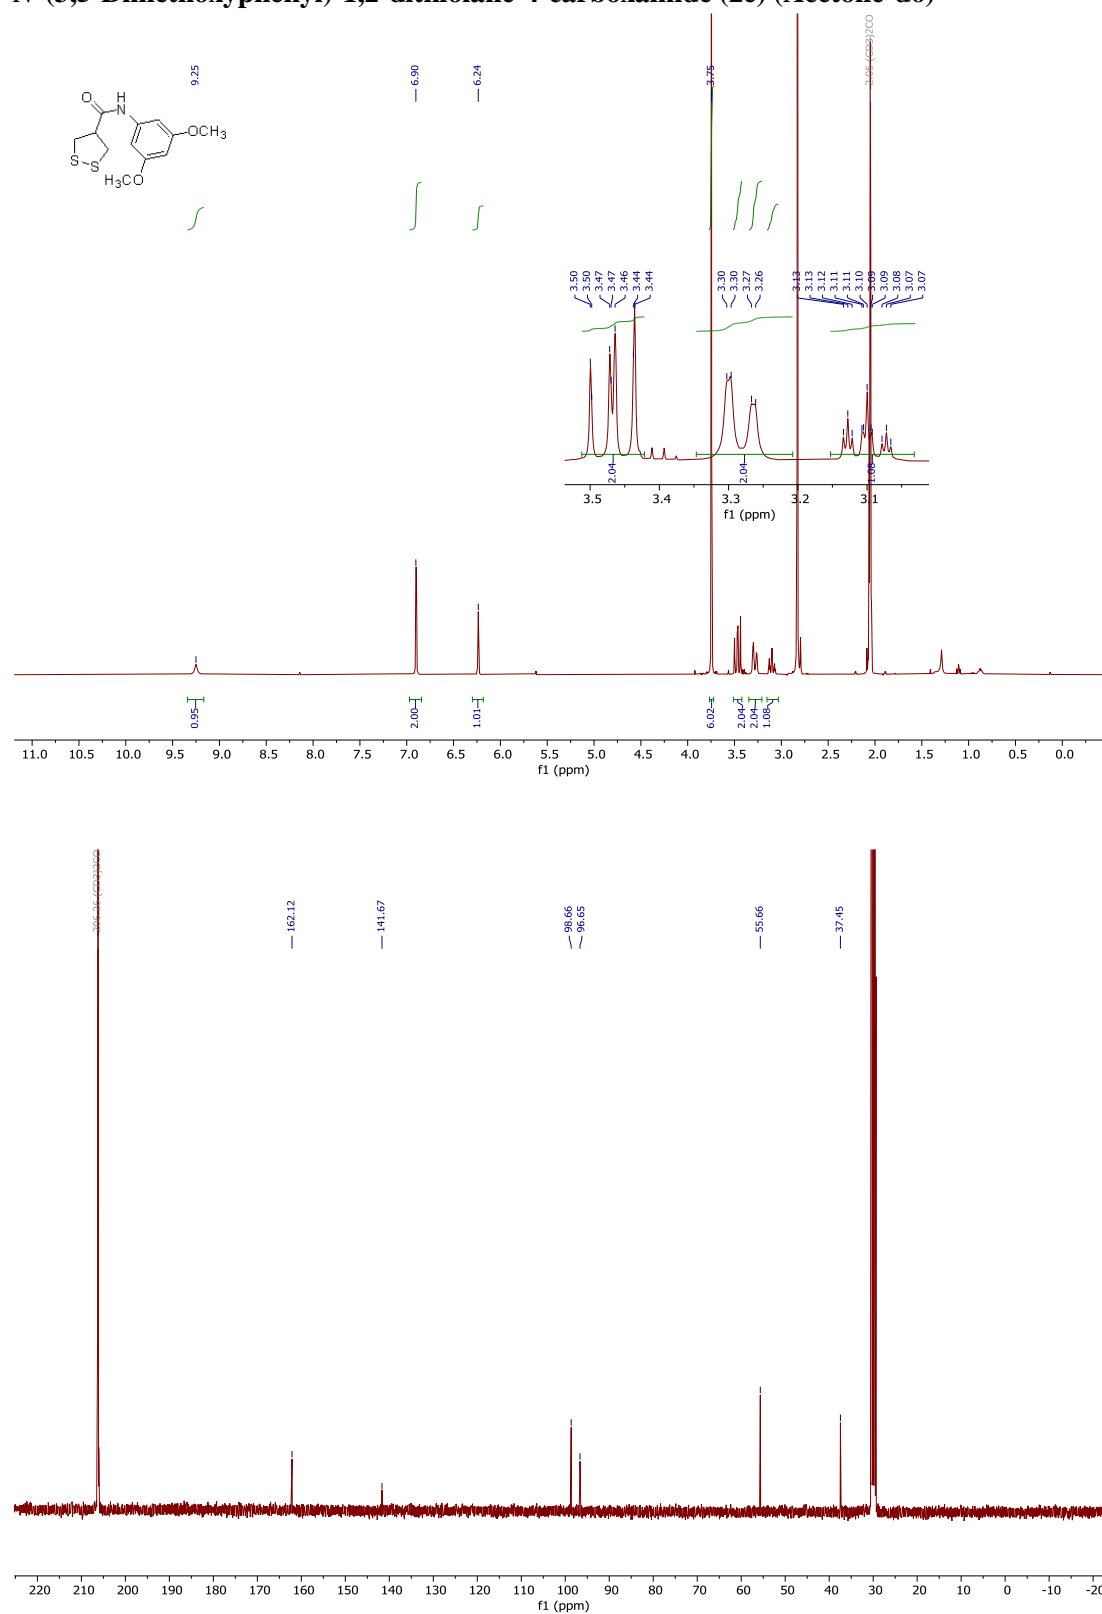

### Single Mass Analysis

Tolerance = 3.0 PPM / DBE: min = -0.5, max = 200.0

Element prediction: Off

Number of isotope peaks used for i-FIT = 5

Monoisotopic Mass, Even Electron Ions

552 formula(e) evaluated with 3 results within limits (all results (up to 1000) for each mass)

Elements Used:

C: 1-100 H: 1-150 N: 0-15 O: 0-15 S: 1-2

2576 Nikitjuka **2e**

HRMS\_2023\_08\_080 692 (1.978) Cm (692:701-634:649)

OSI/FOKL-MS  
Synapt G2-Si  
1: TOF MS ES+  
9.01e+006

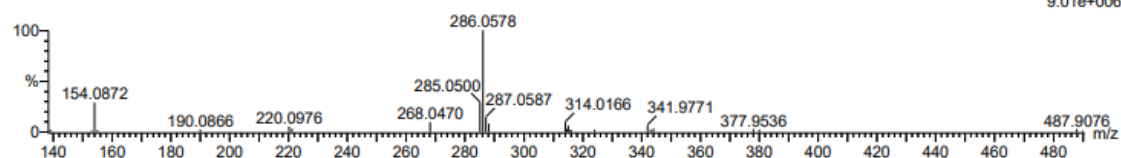

Minimum: -0.5  
Maximum: 10.0 3.0 200.0

| Mass     | Calc. Mass | mDa  | PPM  | DBE | i-FIT | Norm  | Conf(%) | Formula         |
|----------|------------|------|------|-----|-------|-------|---------|-----------------|
| 286.0578 | 286.0583   | -0.5 | -1.7 | 7.5 | 60.5  | 0.235 | 79.09   | C5 H8 N11 O2 S  |
|          | 286.0572   | 0.6  | 2.1  | 5.5 | 66.9  | 6.594 | 0.14    | C12 H16 N O3 S2 |
|          | 286.0570   | 0.8  | 2.8  | 2.5 | 61.9  | 1.572 | 20.77   | C4 H12 N7 O6 S  |

***t*Butyl 2-(1,2-dithiolane-4-carboxamido)-3-methylpentanoate (2f) (CDCl<sub>3</sub>)**

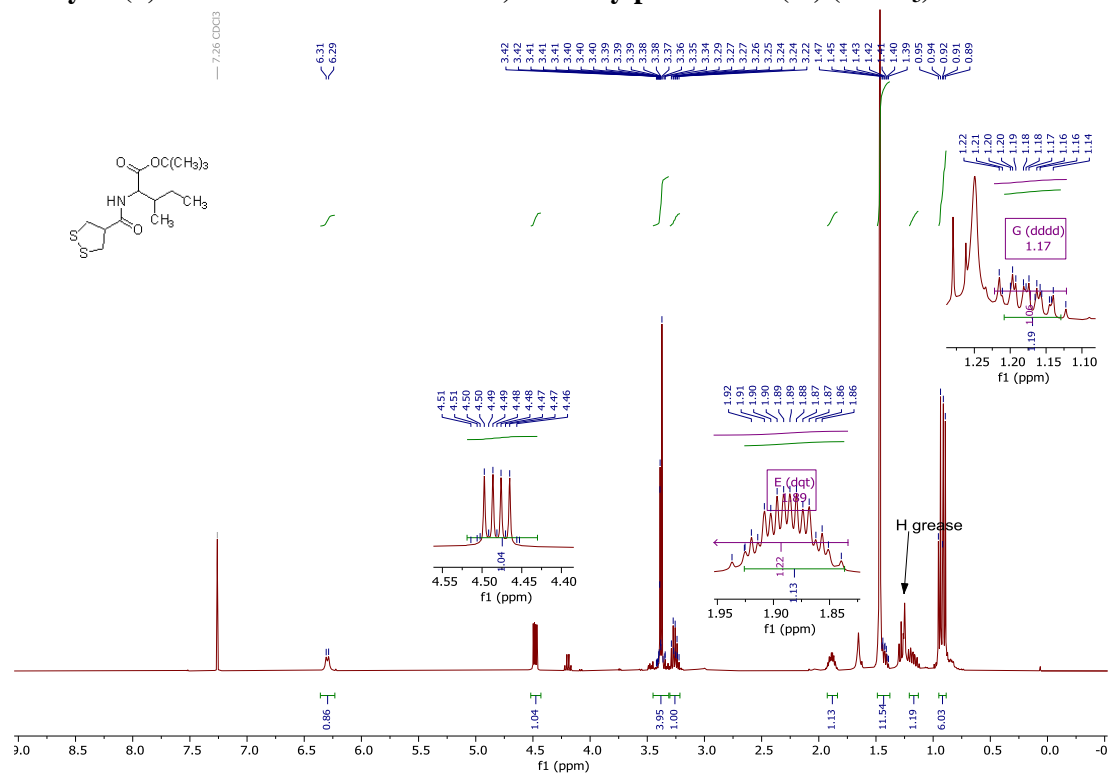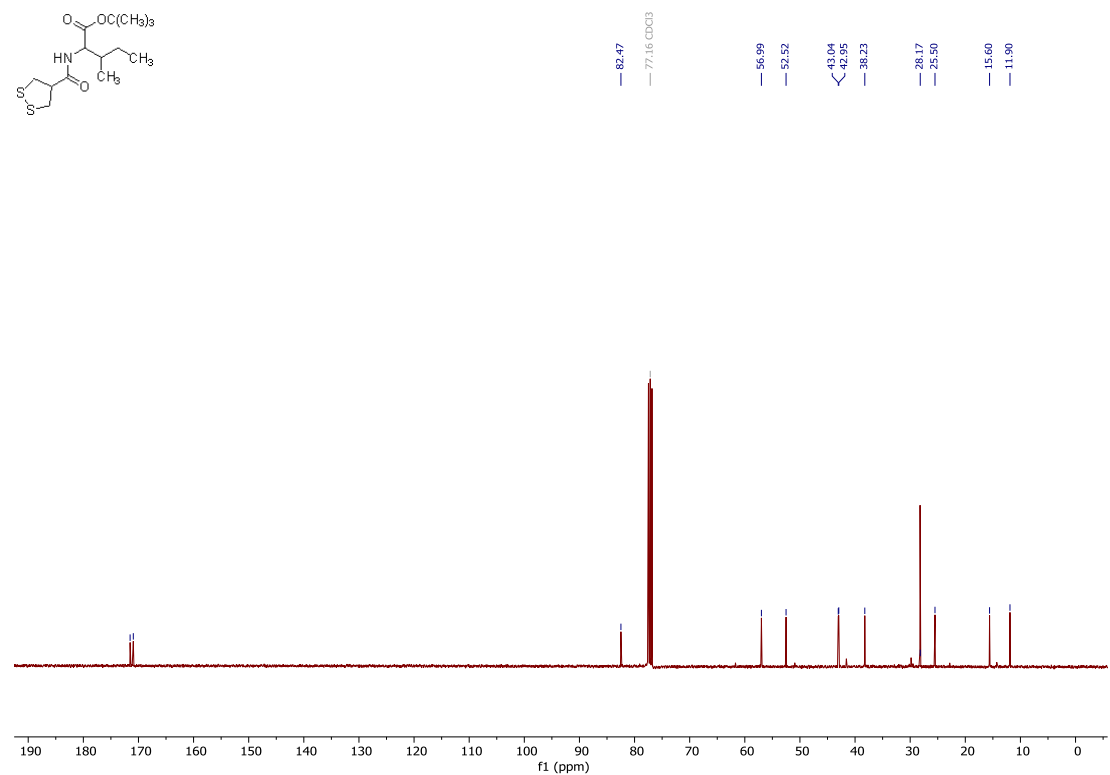

## Single Mass Analysis

Tolerance = 5.0 PPM / DBE: min = -1.5, max = 200.0

Element prediction: Off

Number of isotope peaks used for i-FIT = 5

Monoisotopic Mass, Even Electron Ions

188 formula(e) evaluated with 1 results within limits (all results (up to 1000) for each mass)

Elements Used:

C: 0-50 H: 0-100 N: 0-3 O: 0-3 S: 0-2

2888 Nikutjuka. **2f**

HRMS\_2022\_04\_544 804 (2.257) Cm (802:811-777:789)

OSI/FOKL-MS  
Synapt G2-Si  
1: TOF MS ES-  
5.20e+006

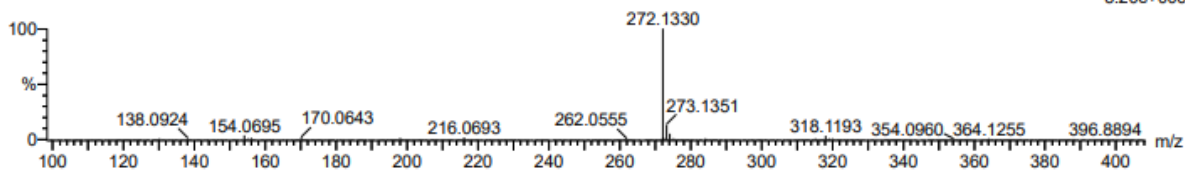

Minimum: -1.5  
Maximum: 2.0 5.0 200.0

| Mass     | Calc. Mass | mDa  | PPM  | DBE | i-FIT | Norm | Conf(%) | Formula         |
|----------|------------|------|------|-----|-------|------|---------|-----------------|
| 318.1193 | 318.1198   | -0.5 | -1.6 | 3.5 | 387.1 | n/a  | n/a     | C14 H24 N O3 S2 |

# **2-(1,2-Dithiolane-4-carboxamido)-3-methylpentanoic acid (2g) (MeOH-d4)**

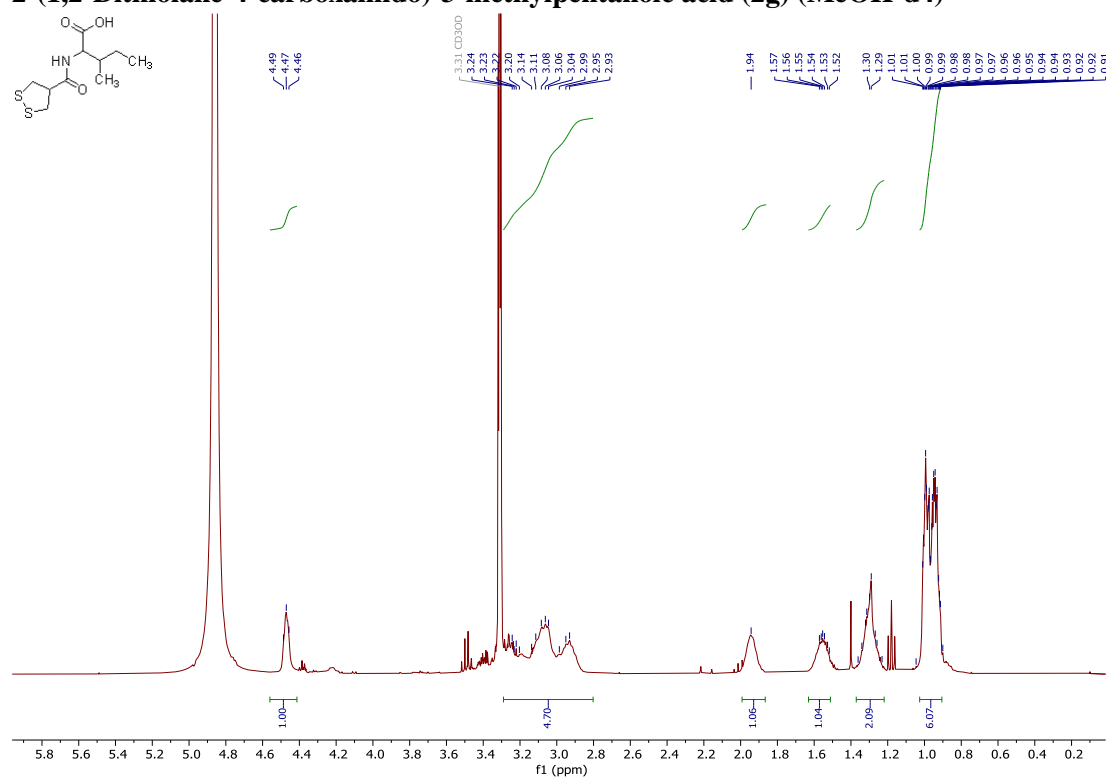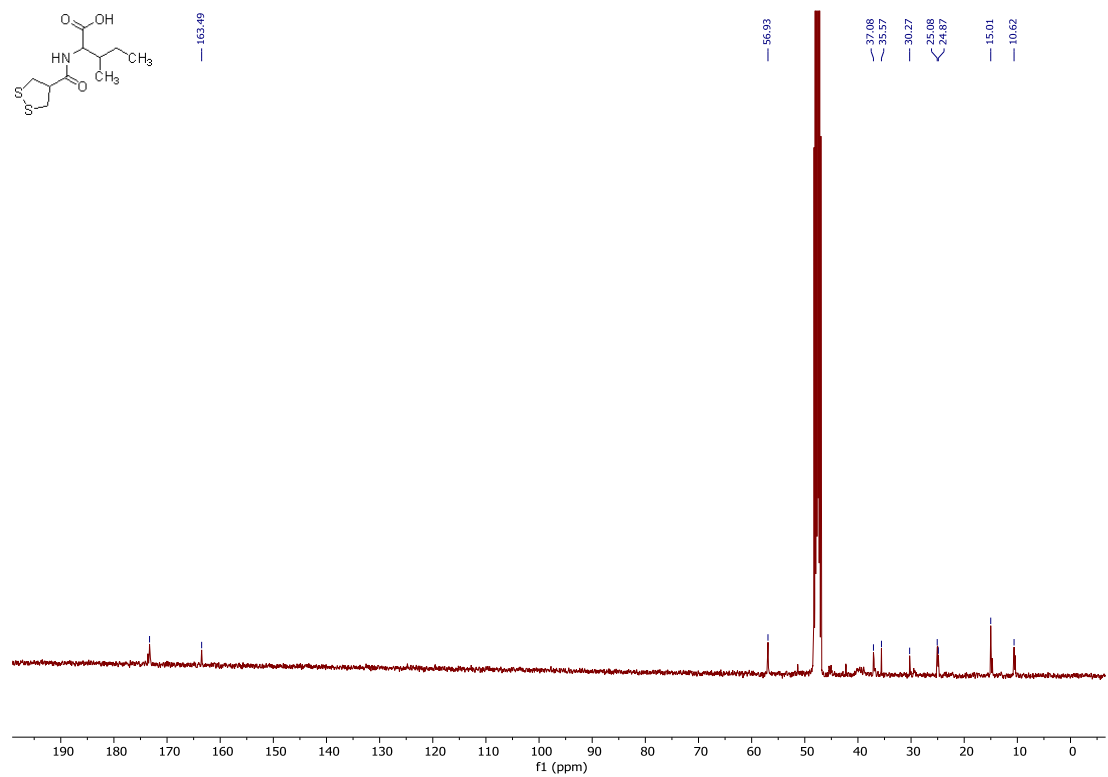

Tolerance = 5.0 PPM / DBE: min = -1.5, max = 200.0

Element prediction: Off

Number of isotope peaks used for i-FIT = 5

Monoisotopic Mass, Even Electron Ions

156 formula(e) evaluated with 1 results within limits (all results (up to 1000) for each mass)

Elements Used:

C: 0-50 H: 0-100 N: 0-3 O: 0-3 S: 0-2

2889 Nikutjuka. **2g**

HRMS\_2022\_04\_543 644 (1.814) Cm (642:651-(621:626+679:684))

OSI/FOKL-MS  
Synapt G2-Si  
1: TOF MS ES-  
4.61e+006

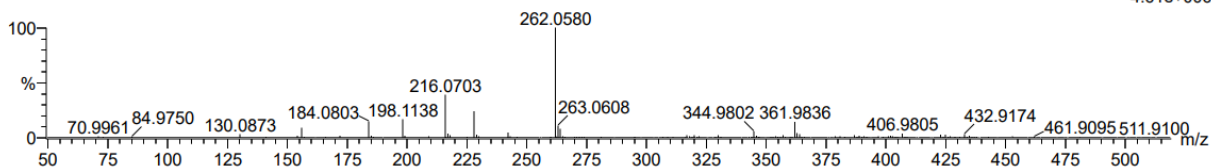

Minimum: 80.00 -1.5  
Maximum: 100.00 2.0 5.0 200.0

| Mass     | RA     | Calc. Mass | mDa | PPM | DBE | i-FIT | Norm | Conf (%) | Formula         |
|----------|--------|------------|-----|-----|-----|-------|------|----------|-----------------|
| 262.0580 | 100.00 | 262.0572   | 0.8 | 3.1 | 3.5 | 799.9 | n/a  | n/a      | C10 H16 N O3 S2 |



# ***N,N*-Dimethyl-1,2-dithiolane-4-carboxamide (2h)**

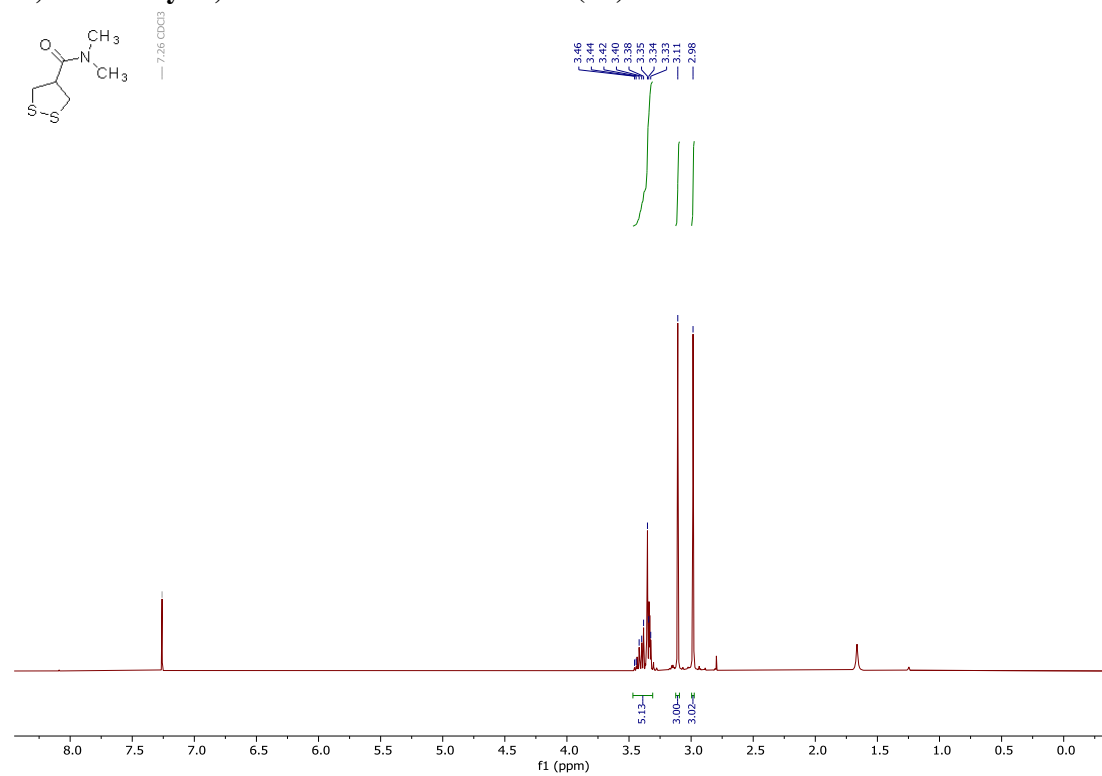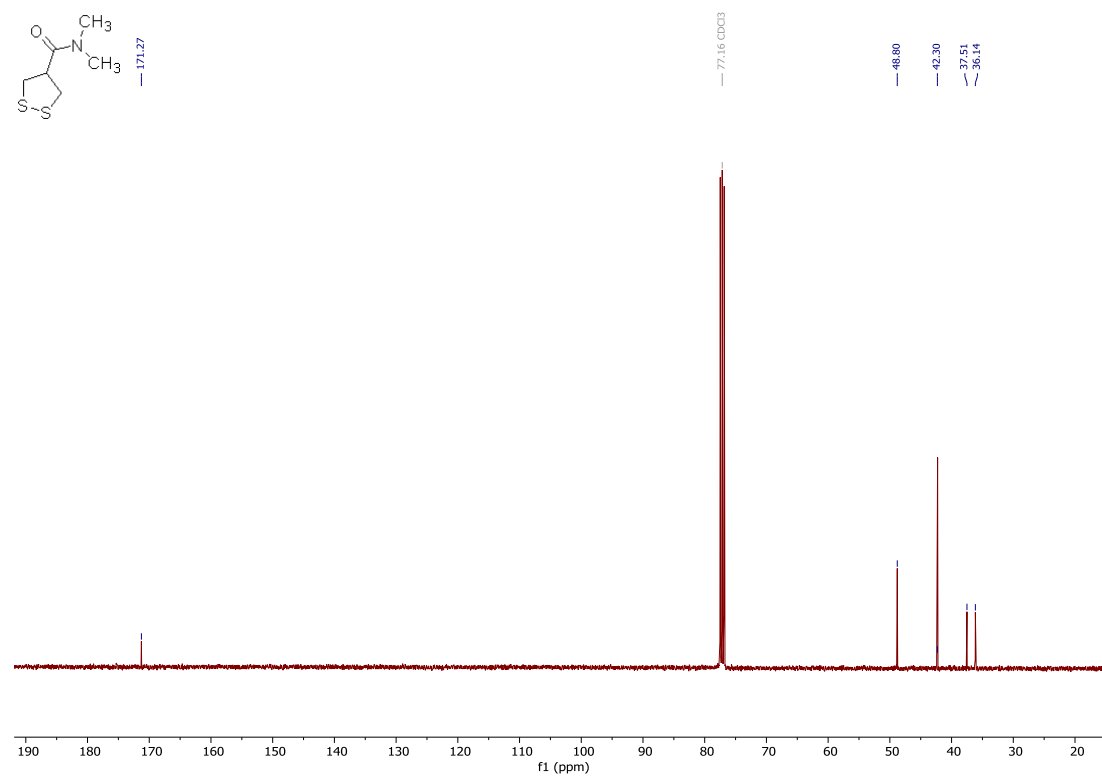

Tolerance = 5.0 PPM / DBE: min = -1.5, max = 200.0

Element prediction: Off

Number of isotope peaks used for i-FIT = 5

Monoisotopic Mass, Even Electron Ions

108 formula(e) evaluated with 1 results within limits (all results (up to 1000) for each mass)

Elements Used:

C: 0-50 H: 0-100 N: 0-3 O: 0-3 S: 0-2

2885 Nikitjuka **2h**

HRMS\_2022\_04\_532 557 (1.598) Cm (557:573-(487:503+603:616))

OSI/FOKL-MS  
Synapt G2-Si  
1: TOF MS ES+  
1.44e+007

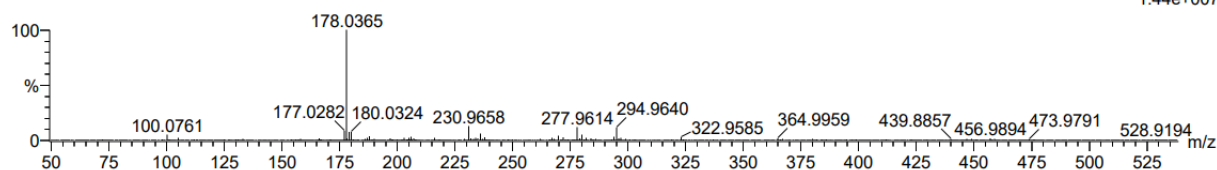

Minimum: 80.00  
Maximum: 100.00

5.0 5.0 -1.5  
200.0

| Mass     | RA     | Calc. Mass | mDa | PPM | DBE | i-FIT | Norm | Conf (%) | Formula       |
|----------|--------|------------|-----|-----|-----|-------|------|----------|---------------|
| 178.0365 | 100.00 | 178.0360   | 0.5 | 2.8 | 1.5 | 919.9 | n/a  | n/a      | C6 H12 N O S2 |

COS(=O)(=O)NC(=O)C1CCSC1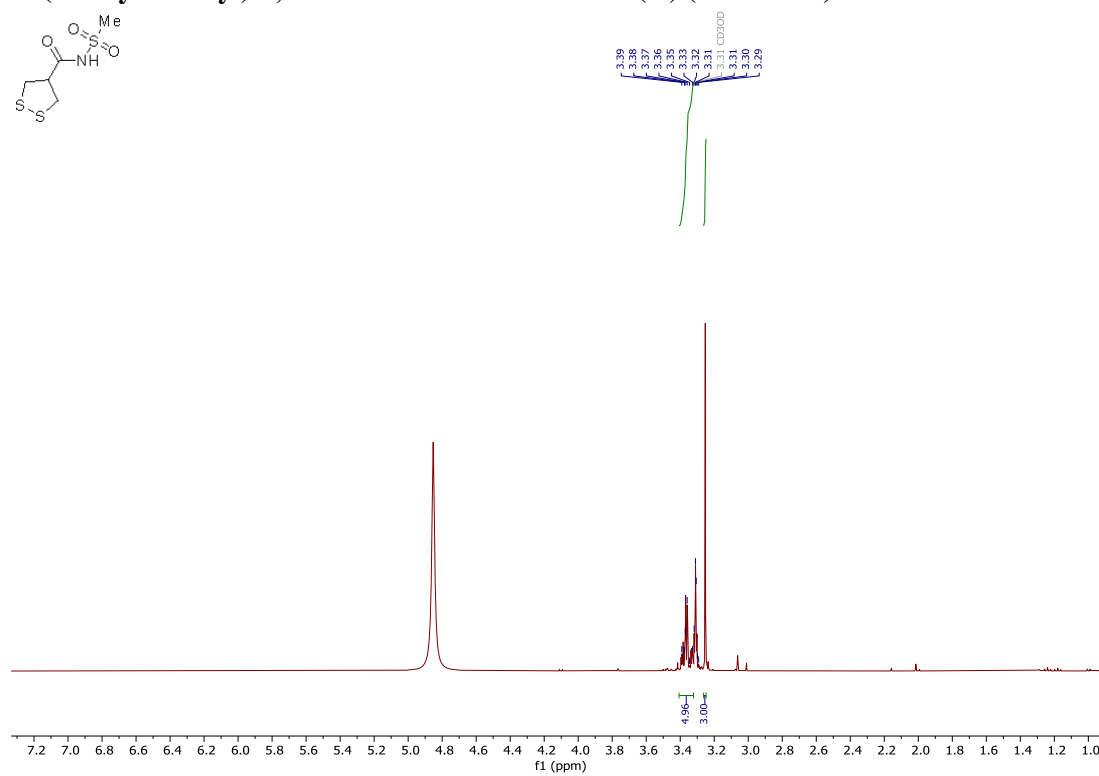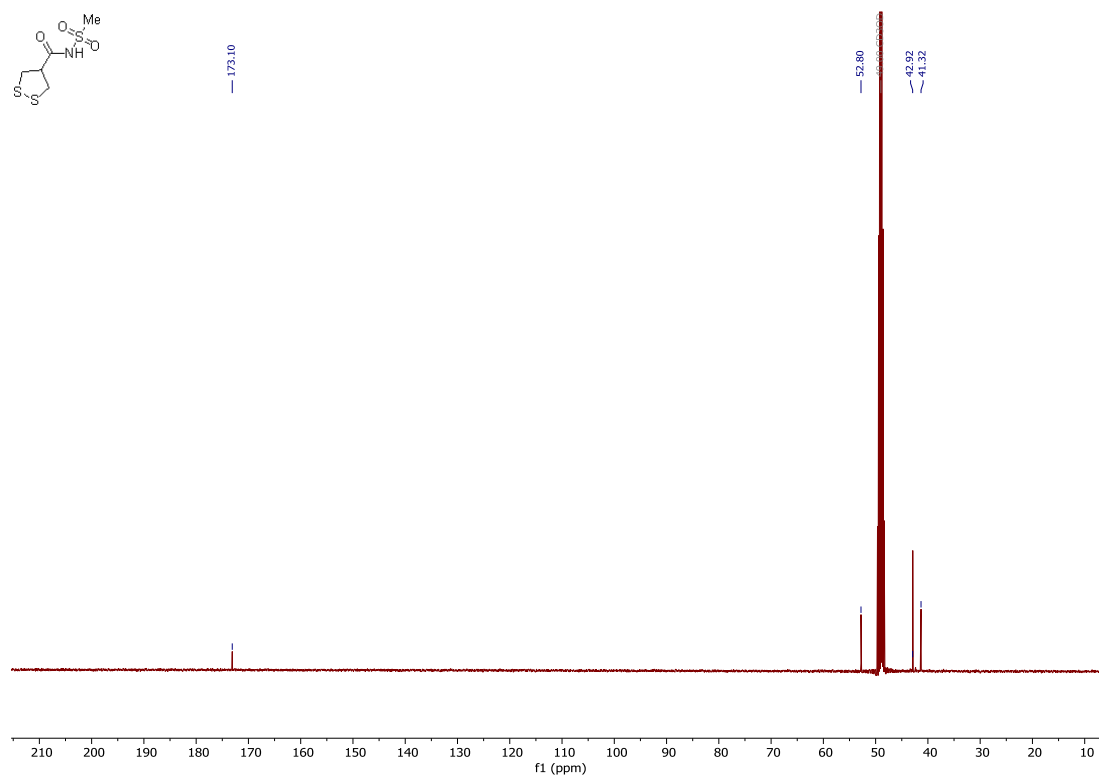

Tolerance = 5.0 PPM / DBE: min = -1.5, max = 200.0

Element prediction: Off

Number of isotope peaks used for i-FIT = 5

Monoisotopic Mass, Even Electron Ions

181 formula(e) evaluated with 1 results within limits (all results (up to 1000) for each mass)

Elements Used:

C: 0-50 H: 0-100 N: 0-2 O: 0-5 S: 0-3

2884 Nikutjuka **2i**

OSI/FOKL-MS

Synapt G2-Si

1: TOF MS ES-

3.16e+006

HRMS\_2022\_04\_546 573 (1.614) Cm (573:580-(542:548+599:603))

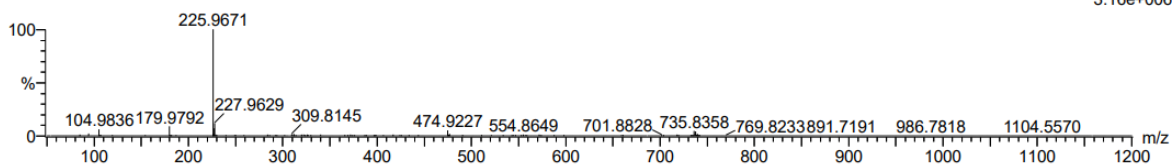

Minimum: 80.00  
Maximum: 100.00

2.0 5.0 -1.5  
200.0

| Mass     | RA     | Calc. Mass | mDa | PPM | DBE | i-FIT | Norm | Conf (%) | Formula       |
|----------|--------|------------|-----|-----|-----|-------|------|----------|---------------|
| 225.9671 | 100.00 | 225.9666   | 0.5 | 2.2 | 2.5 | 718.6 | n/a  | n/a      | C5 H8 N O3 S3 |

***N*-(2-Oxo-2H-chromen-6-yl)-1,2-dithiolane-4-carboxamide (2j)**

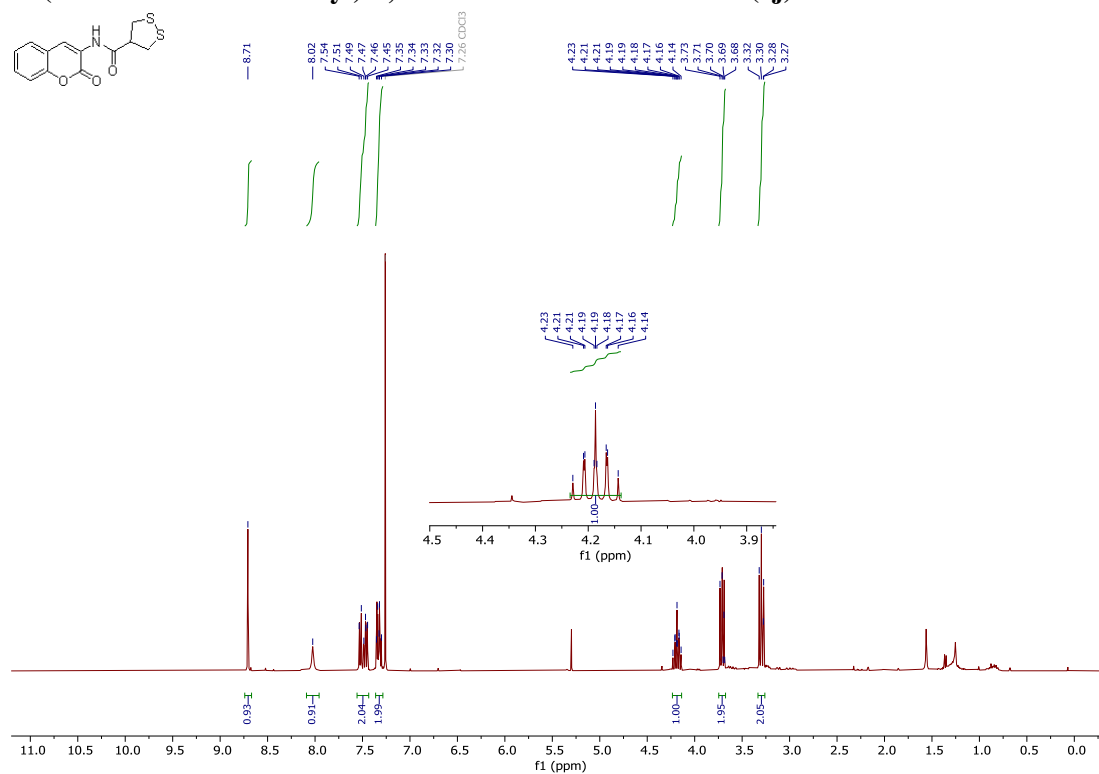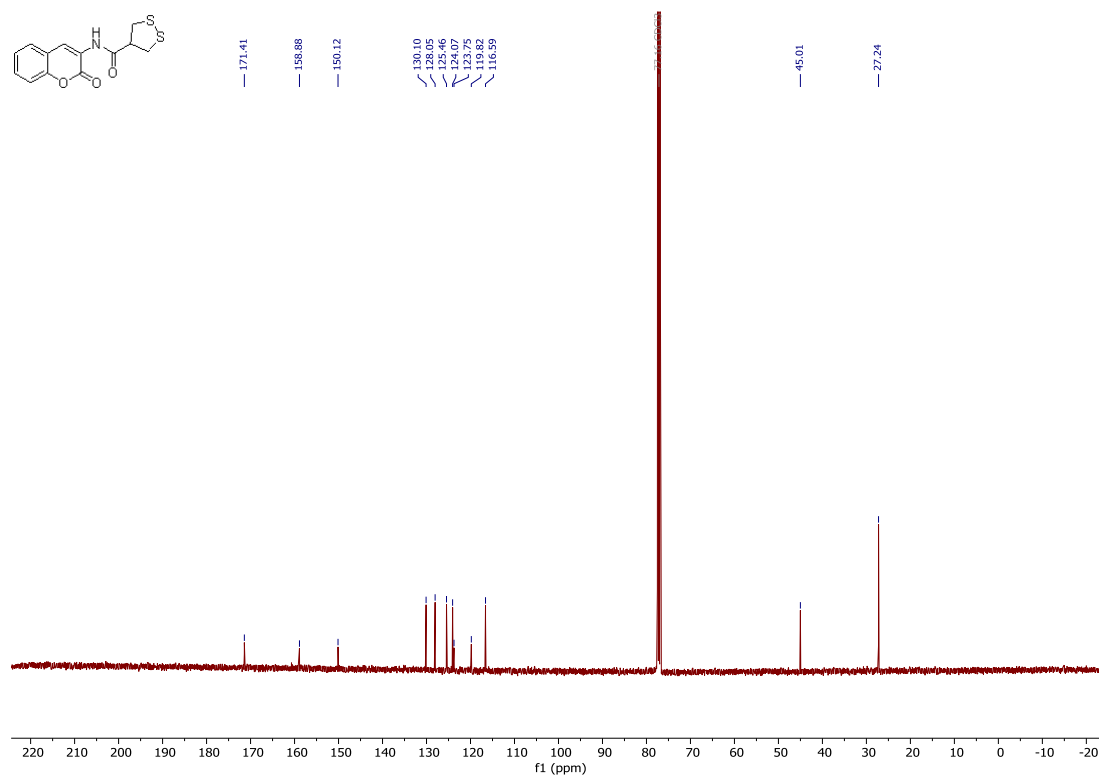

***N*-(2-oxo-2H-chromen-3-yl)-1,2-dithiolane-4-carboxamide (2k) (CD<sub>3</sub>CN/Acetone, low solubility)**

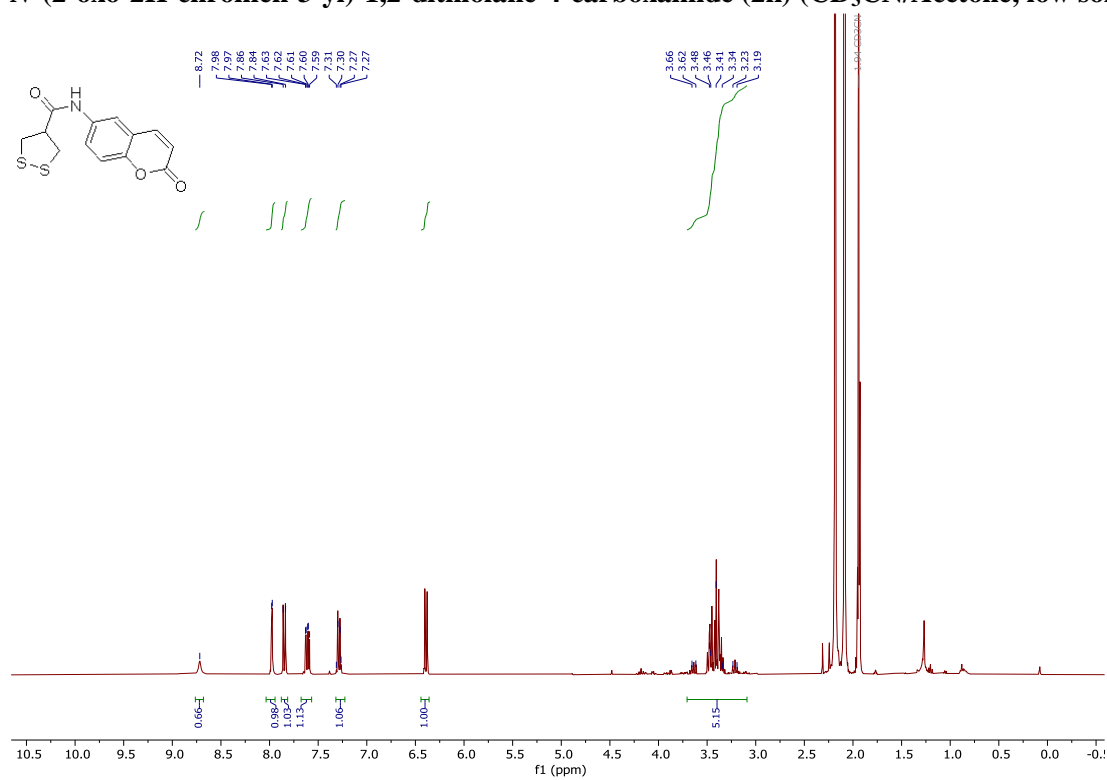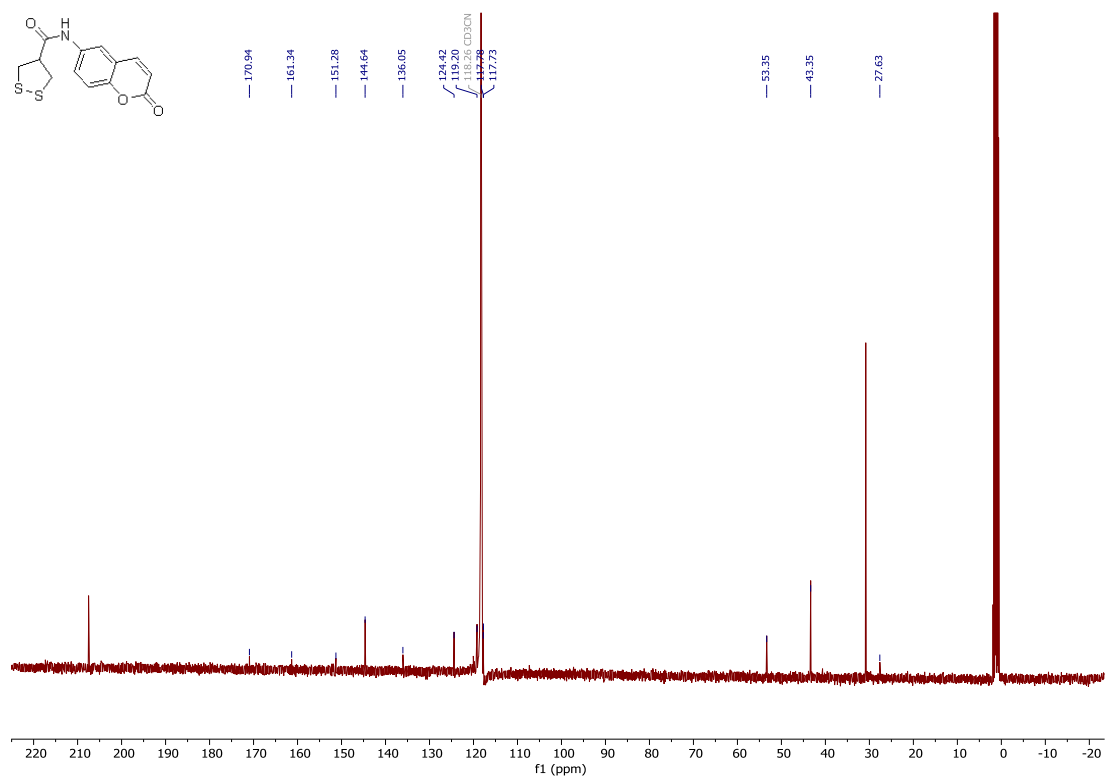

### Single Mass Analysis

Tolerance = 5.0 PPM / DBE: min = -1.5, max = 200.0

Element prediction: Off

Number of isotope peaks used for i-FIT = 5

Monoisotopic Mass, Even Electron Ions

248 formula(e) evaluated with 1 results within limits (all results (up to 1000) for each mass)

Elements Used:

C: 0-80 H: 0-150 N: 0-10 O: 0-10 S: 2-2

3118 Nikitjuka. 2k

HRMS\_2022\_05\_322 658 (1.885) Cm (658:662-(672:677+629:640))

OSI/FOKL-MS  
Synapt G2-Si  
1: TOF MS ES+  
7.83e+005

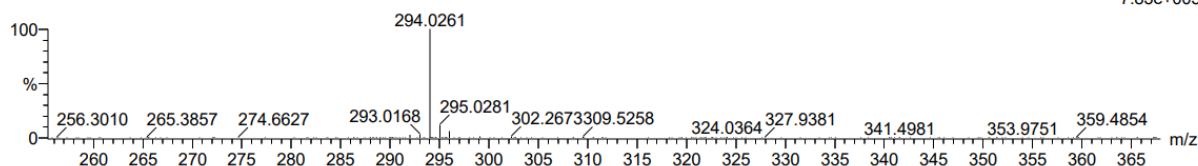

Minimum: -1.5  
Maximum: 2.0 5.0 200.0

| Mass     | Calc. Mass | mDa | PPM | DBE | i-FIT | Norm | Conf (%) | Formula         |
|----------|------------|-----|-----|-----|-------|------|----------|-----------------|
| 294.0261 | 294.0259   | 0.2 | 0.7 | 8.5 | 178.1 | n/a  | n/a      | C13 H12 N O3 S2 |

***N*-(4-methyl-2-oxo-2H-chromen-7-yl)-1,2-dithiolane-4-carboxamide (21, 1,2-dithiolane signal is overlapped with residue water signal )**

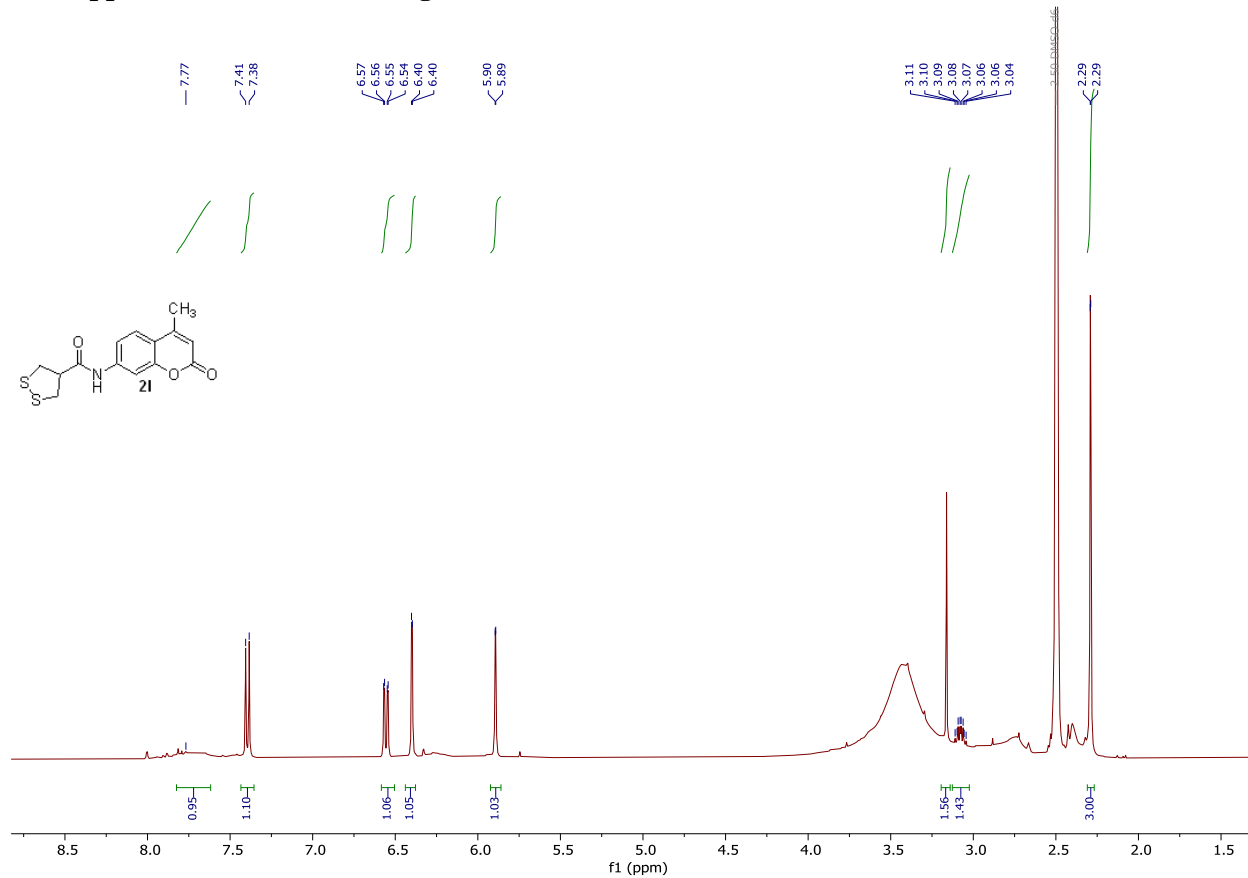



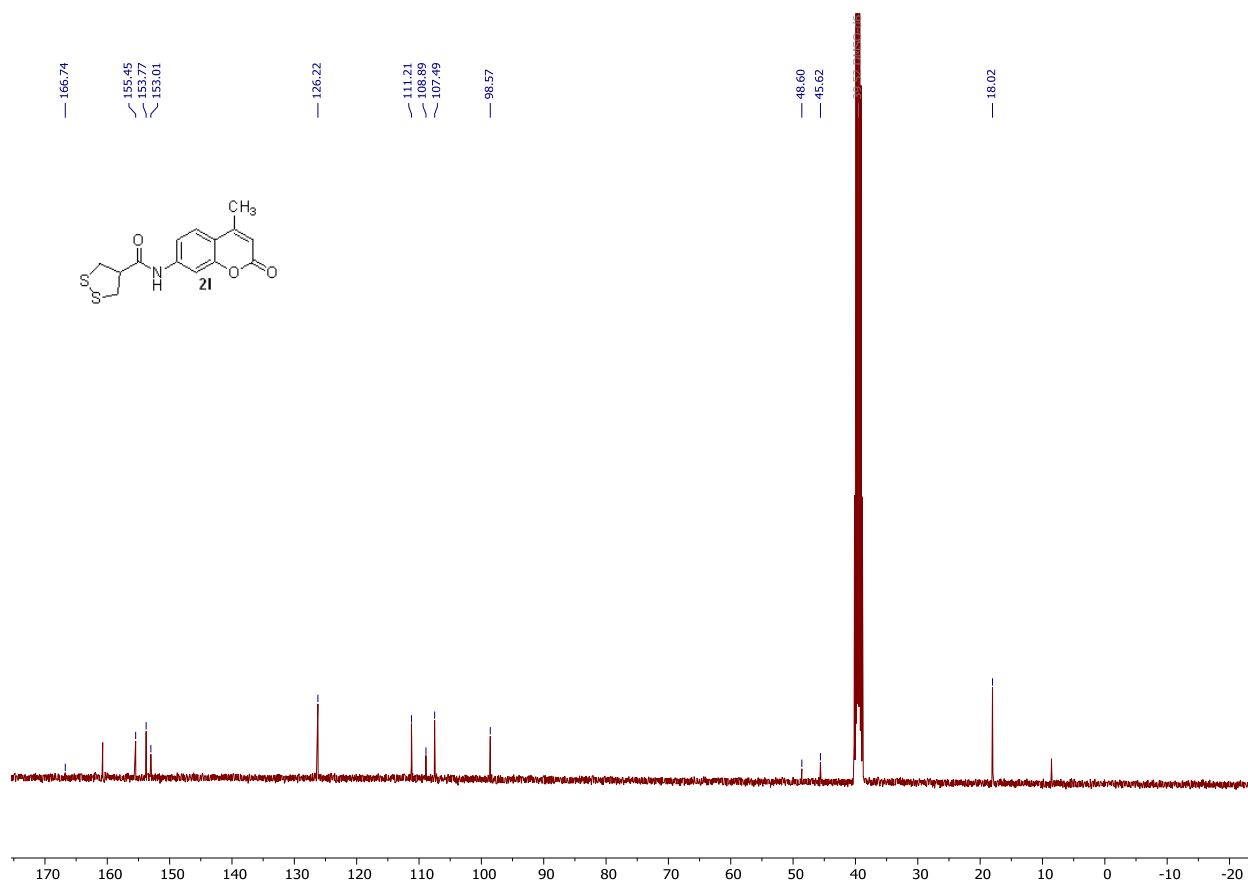

### Single Mass Analysis

Tolerance = 5.0 PPM / DBE: min = -1.5, max = 200.0

Element prediction: Off

Number of isotope peaks used for i-FIT = 5

Monoisotopic Mass, Even Electron Ions

276 formula(e) evaluated with 1 results within limits (all results (up to 1000) for each mass)

Elements Used:

C: 0-80 H: 0-150 N: 0-10 O: 0-10 S: 2-2

3119 Nikitjuka **2I**

HRMS\_2022\_05\_324 673 (1.926) Cm (672:679-(654:660+700))

OSI/FOKL-MS  
Synapt G2-Si  
1: TOF MS ES+  
9.46e+005

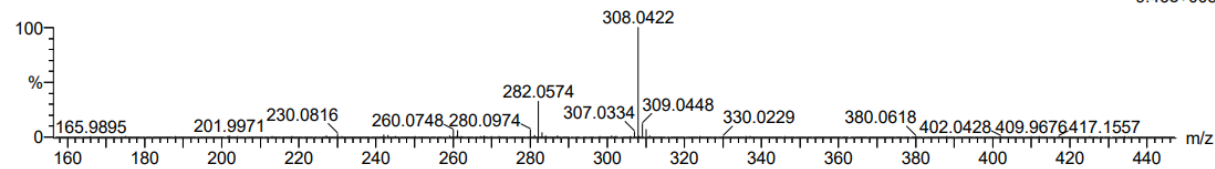

Minimum: -1.5  
Maximum: 2.0 5.0 200.0

| Mass     | Calc. Mass | mDa | PPM | DBE | i-FIT | Norm | Conf (%) | Formula         |
|----------|------------|-----|-----|-----|-------|------|----------|-----------------|
| 308.0422 | 308.0415   | 0.7 | 2.3 | 8.5 | 694.8 | n/a  | n/a      | C14 H14 N O3 S2 |

## Determination of the Reaction Rate and IC<sub>50</sub> of colorimetric TrxR1 enzymatic assays

IC<sub>50</sub> was obtained using Thioredoxin Reductase Colorimetric Assay Kit provided by Cayman Chemicals and the provided kit booklet was used for the IC<sub>50</sub> calculation ([Thioredoxin Reductase Colorimetric Assay Kit \(TrxR, TxnR\) | Cayman Chemical](#)). In brief, the reaction rate ( $\Delta A$ ) was determined and corrected:

$$\Delta A/\text{min}(\text{sample}) - [\Delta A/\text{min}(\text{sample}+\text{enzyme}) - \Delta A/\text{min}(\text{Background}+\text{enzyme})]$$

$$\text{TrxR activity} = \frac{\Delta A}{\text{min}(\text{sample}) - [\Delta A/\text{min}(\text{sample}+\text{enzyme}) - \Delta A/\text{min}(\text{Background}+\text{enzyme})]}$$

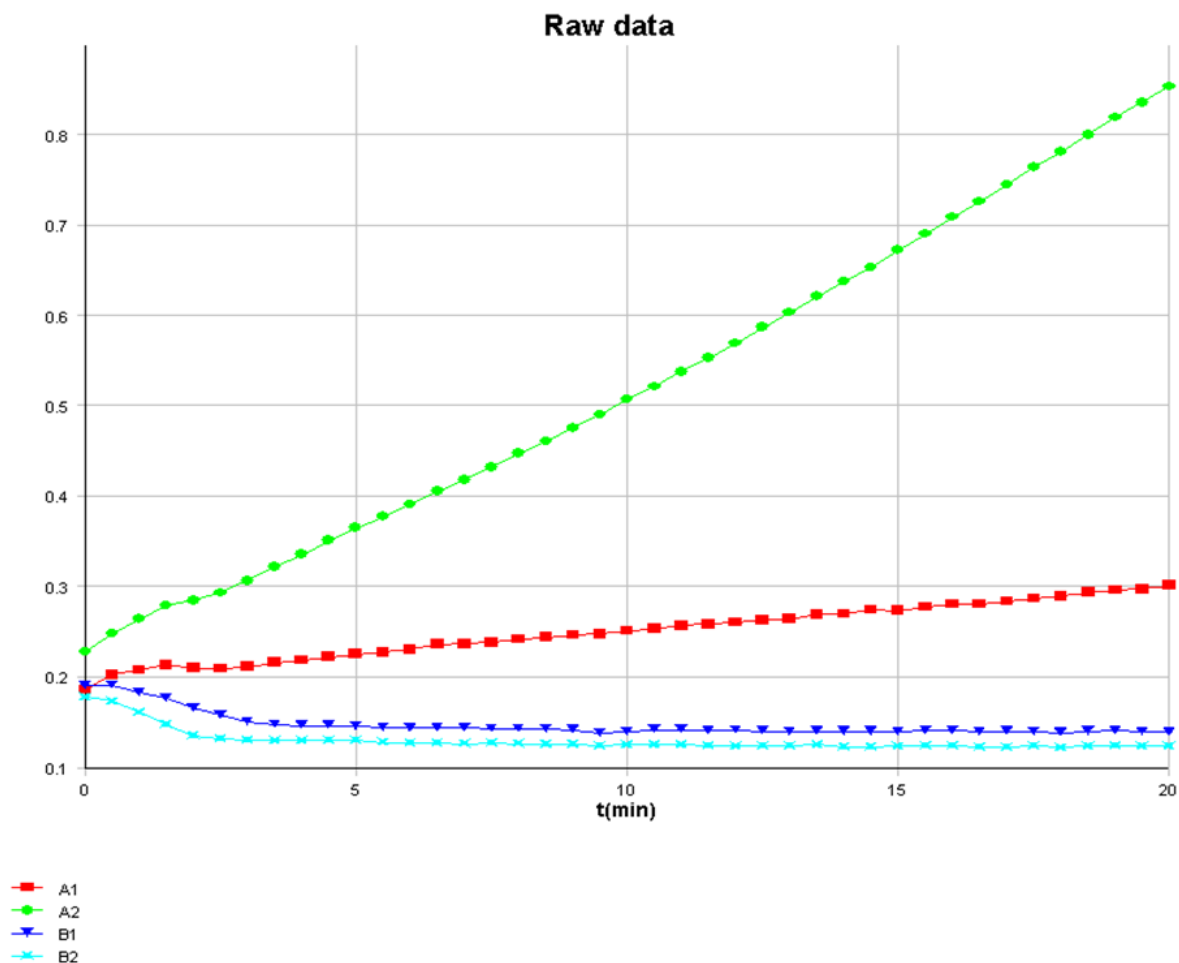

Figure S1. Representative example of activity plot of the rat liver TrxR1 (x = time (minutes); y = absorbance at 405 nm).
